# Supplementary material for: Water droplet-driven and perforated conducting polymer composite energy harvester: platform for powering portable and wearable electronics
Source: Royal Society of Chemistry journal article supplement (doi:10.1039/d5ra04176g), 2025-01-01
Supplement: d5ra04176g1.pdf [file d5ra04176g1.pdf]

# Supporting information for:

## **Water droplet-driven and perforated conducting polymer composite energy harvester: Platform for powering portable and wearable electronics**

Vinod V. T. Padil<sup>1,+</sup>, Sung-Ho Shin<sup>2,+</sup>, Min Wook Pin<sup>3</sup>, Joon Ha Chang<sup>4</sup>, Hyeon Do Shin<sup>5</sup>, Daniel M. Mulvihill<sup>6</sup>, Jiamu Qian<sup>6</sup>, Paolo Matteini<sup>7</sup>, Byungil Hwang<sup>8,\*</sup>, Tae Gwang Yun<sup>9,\*</sup>, Jun Young Cheong<sup>6,\*</sup>, Il-Doo Kim<sup>2,10\*</sup>

<sup>1</sup>School of Nanoscience (SNS), Central University of Gujarat (CUG), Kundhela-391107, Vadodara, Gujarat, India

<sup>2</sup>Department of Business Incubation Center, Korea Advanced Institute of Science and Technology, 193 Munji-ro, Yuseong-gu, Daejeon 34051, Republic of Korea.

<sup>3</sup>Analysis and Assessment Research Group, Research Institute of Industrial Science and Technology (RIST), 37673, Republic of Korea

<sup>4</sup>Department of Materials Science and Engineering, Korea National University of Transportation, Chungju 27469 Republic of Korea

<sup>5</sup>Department of Material Science and Engineering, Polymer Division, Graduate School of Chungnam National University, 99 Daehak-ro, Yuseong District, Daejeon, Republic of Korea

<sup>6</sup>James Watt School of Engineering, University of Glasgow, Glasgow, G12 8QQ, UK

<sup>7</sup>Institute of Applied Physics “Nello Carrara”, National Research Council, 50019 Sesto Fiorentino, Italy

<sup>8</sup>School of Integrative Engineering, Chung-Ang University, Seoul 06974, Republic of Korea

<sup>9</sup>Department of Molecular Science and Technology, Ajou University, Suwon 16499, Republic of Korea

<sup>10</sup>Department of Materials Science and Engineering, KAIST, Daejeon 34141, Republic of Korea

<sup>+</sup>: These authors contributed equally to this work.

Corresponding author: [bihwang@cau.ac.kr](mailto:bihwang@cau.ac.kr) (Prof. B. Hwang) / [ytk0402@ajou.ac.kr](mailto:ytk0402@ajou.ac.kr) (Prof. T. G. Yun) / [JunYoung.Cheong@glasgow.ac.uk](mailto:JunYoung.Cheong@glasgow.ac.uk) (Dr. Jun Young Cheong) / [idkim@kaist.ac.kr](mailto:idkim@kaist.ac.kr) (Prof. Il-Doo Kim)

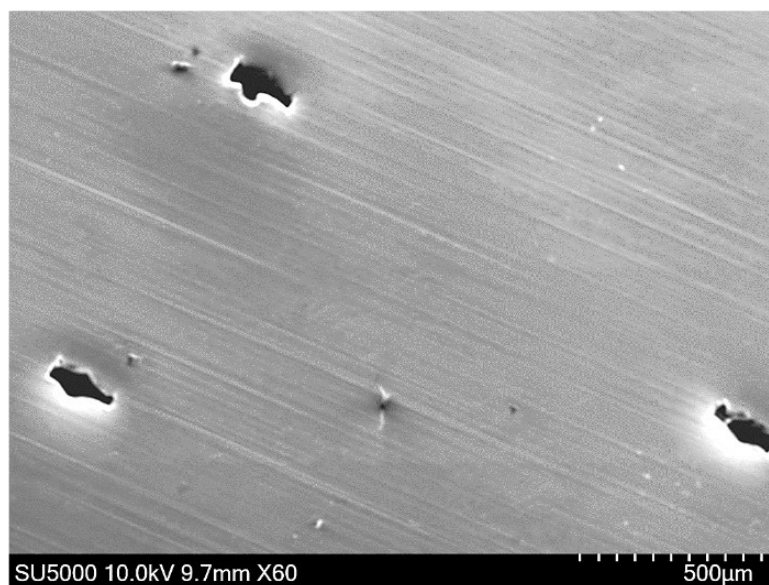

**Fig. S1.** SEM image, showing the prepared Al electrode by using microneedle roller.

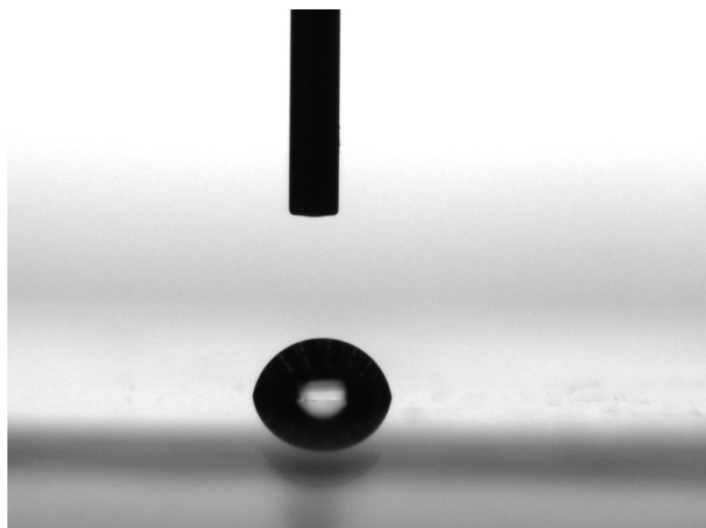

**Fig. S2.** Water contact angle measurement, showing the hydrophilic property of sample without the functionalization FOTS treatment.

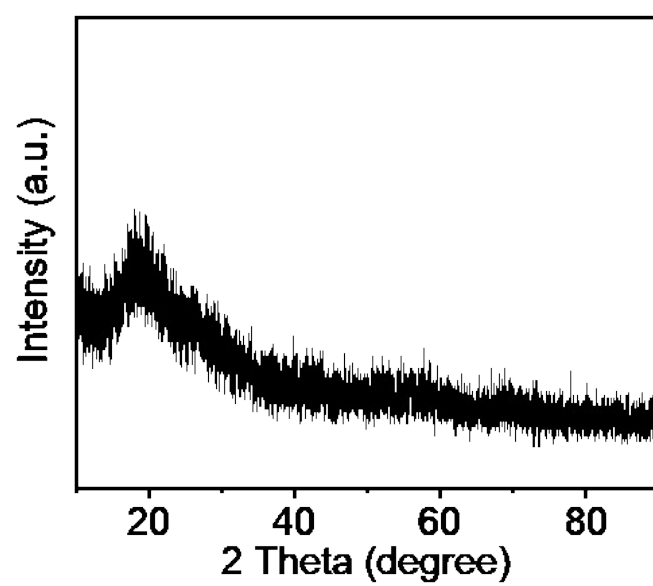

**Fig. S3.** XRD patterns of PVA/PSSA-MA composite showing its amorphous nature.

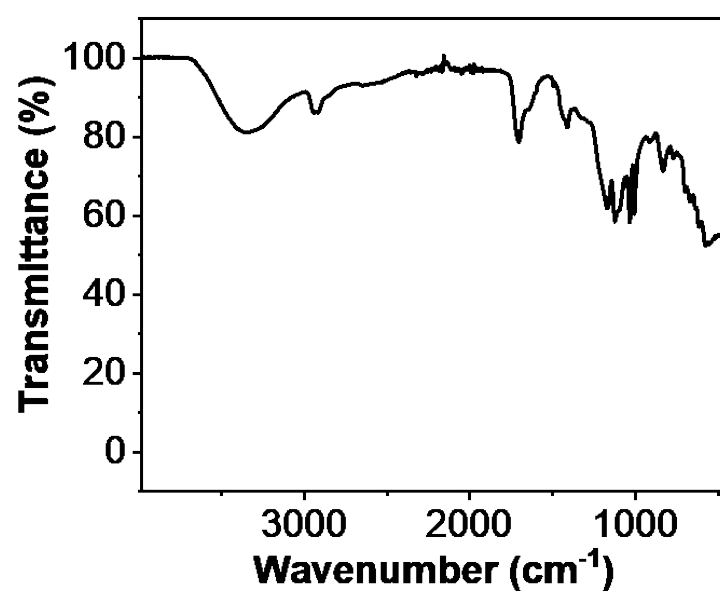

**Fig. S4.** FTIR curve of PVA/PSSA-MA composite.

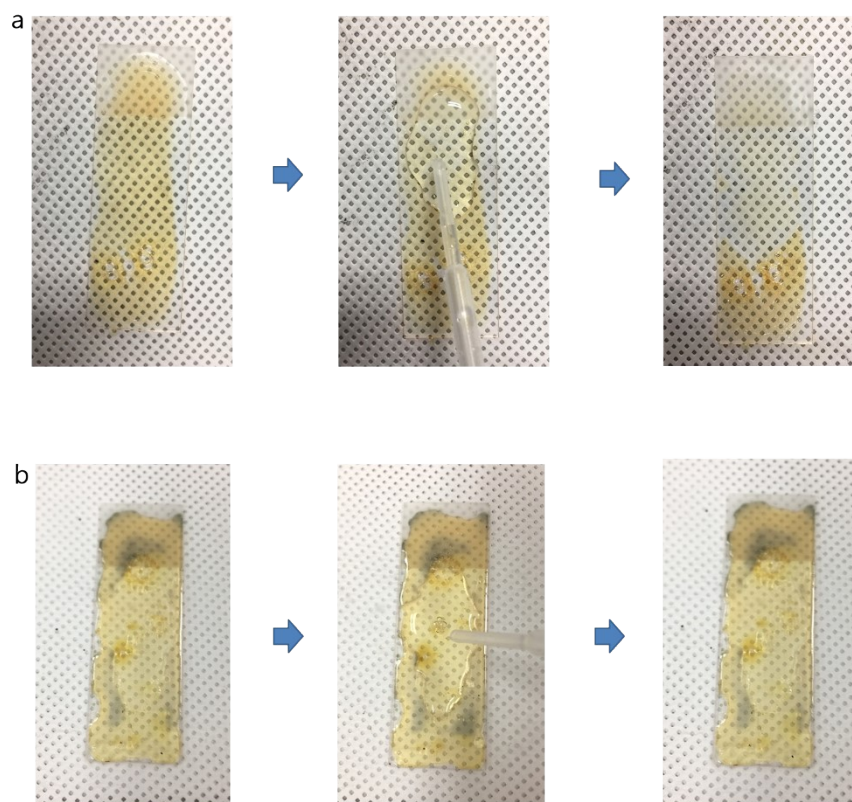

**Fig. S5.** Photograph of the different composite. (a) Poor durability of sample based on PSSA only. (b) Durable sample by water contact, attributed to the crosslinked network.

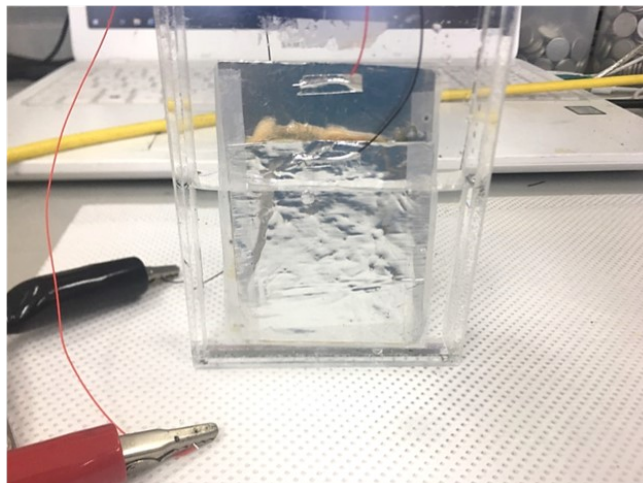

**Fig. S6.** (a) Photograph, showing the output measurement in dipping state.



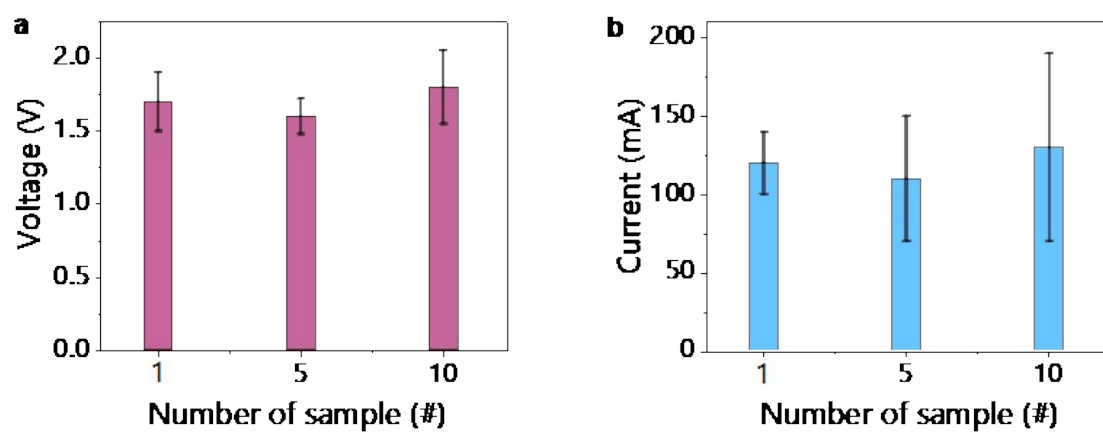

**Fig. S7.** Measurement data, showing the deviation using 1, 5, 10 samples. (a) Output voltage deviation. (b) Output current deviation.

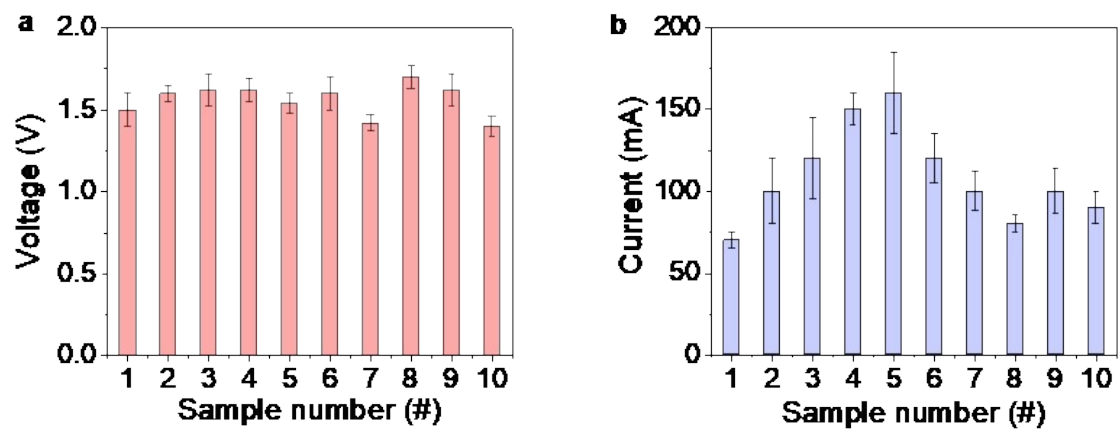

**Fig. S8.** Measurement data, showing the deviation under five repetitive cycles for each samples. (a) Output voltage deviation. (b) Output current deviation.

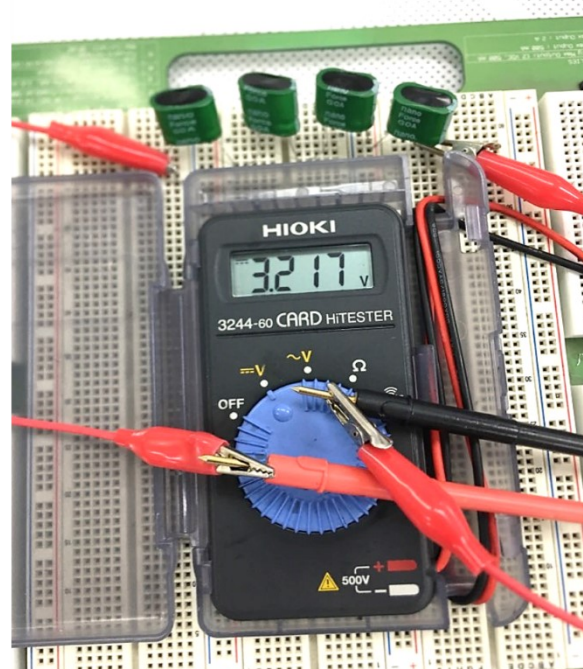

**Fig. S9.** Charged output voltage using four supercapacitors of 200 mF in serial connection.
